---

# CLOSED-LOOP NEUROSCIENCE OF BRAIN RHYTHMS: OPTIMIZING REAL-TIME QUANTIFICATION OF NARROW-BAND SIGNALS TO EXPEDITE FEEDBACK DELIVERY

---

A PREPRINT

**Nikolai Smetanin**

Center for Bioelectric Interfaces  
Higher School of Economics  
Moscow, Russia, 101000  
n.m.smetanin@gmail.com

**Anastasia Belinskaya**

Center for Bioelectric Interfaces  
Higher School of Economics  
Moscow, Russia, 101000  
belinskaya.anastasy@gmail.com

**Mikhail Lebedev**

Center for Bioelectric Interfaces  
Higher School of Economics  
Moscow, Russia, 101000  
mikhail.lebedev@gmail.com

**Alexei Ossadtchi\***

Center for Bioelectric Interfaces  
Higher School of Economics  
Moscow, Russia, 101000  
ossadtchi@gmail.com

November 29, 2019

1 **Keywords** Closed-loop neuroscience, neurofeedback, brain rhythm, envelope, instantaneous phase, feedback latency,  
2 optimal filtering, Hilbert transform

## ABSTRACT

3 Closed-loop Neuroscience is based on the experimental approach where the ongoing brain activity is  
4 recorded, processed, and passed back to the brain as sensory feedback or direct stimulation of neural  
5 circuits. The artificial closed loops constructed with this approach expand the traditional stimulus-  
6 response experimentation. As such, closed-loop Neuroscience provides insights on the function of  
7 loops existing in the brain and the ways the flow of neural information could be modified to treat  
8 neurological conditions.

9 Neural oscillations, or brain rhythms, are a class of neural activities that have been extensively  
10 studied and also utilized in brain rhythm-contingent (BRC) paradigms that incorporate closed loops.  
11 In these implementations, instantaneous power and phase of neural oscillations form the signal that  
12 is fed back to the brain.

13 Here we addressed the problem of feedback delay in BRC paradigms. In many BRC systems, it  
14 is critical to keep the delay short. Long delays could render the intended modification of neural  
15 activity impossible because the stimulus is delivered after the targeted neural pattern has already  
16 completed. Yet, the processing time needed to extract oscillatory components from the broad-band  
17 neural signals can significantly exceed the period of oscillations, which puts a demand for algorithms  
18 that could minimize the delay.

19 We used EEG data collected in human subjects to systematically investigate the performance of a  
20 range of signal processing methods in the context of minimizing delay in BRC systems. We proposed  
21 a family of techniques based on the least-squares filter design – a transparent and simple approach,  
22 as it required a single parameter to adjust the accuracy versus latency trade-off. Our algorithm  
23 performed on par or better than the state-of-the-art techniques currently used for the estimation of  
24 rhythm envelope and phase in closed-loop EEG paradigms.

## 25 1 Introduction

26 Investigations of neural oscillations have a long history and continue to be an area of intensive research, particularly  
27 when such neuroimaging techniques are used as noninvasive electroencephalography (EEG) and magnetoencephalog-  
28 raphy (MEG), and invasive electrocorticography (ECoG) and stereo EEG (sEEG).

29 A plethora of experimental paradigms and relevant analysis methods have been developed for dealing with specific  
30 types of neuronal oscillations, including the methods for their induction and suppression [1, 2]. These paradigms fall  
31 in one of two categories. In the first category of studies, changes in neural oscillations are investigated that are induced  
32 by a variety of stimuli; the stimuli are presented without a consideration of the ongoing brain activity. In the second  
33 category [3], a closed-loop design is implemented where the stimuli are selected based on the characteristics of the  
34 ongoing brain activity.

35 Below, we describe the studies from the second category where the closed loop is formed from neural oscillatory  
36 activity. We refer to this experimental approach as brain rhythm contingent (BRC) paradigm.

### 37 1.1 Brain rhythm contingent paradigms

38 As shown in Figure 1A, the BRC paradigm operates through three steps: data acquisition, data processing, and stimulus  
39 generation. During the data acquisition step, brain activity is measured, usually with multiple spatially distributed  
40 electromagnetic sensors, and streamed to a computer. During the data processing step, a computer routine handles  
41 the multichannel data in real-time to extract the parameters of oscillatory activity, typically amplitude and phase.  
42 Lastly, during the stimulus generation step, these parameters are converted into a feedback delivered to the brain either  
43 directly, using stimulation applied to the nervous tissue (also called neuromodulation), or through natural senses:  
44 vision, hearing or touch. The feedback could act in a subtle way by modulating the parameters of an already ongoing  
45 stimulation (direct or through natural senses) or by contributing to the algorithm that selects a stimulus from a set of  
46 discrete possibilities.

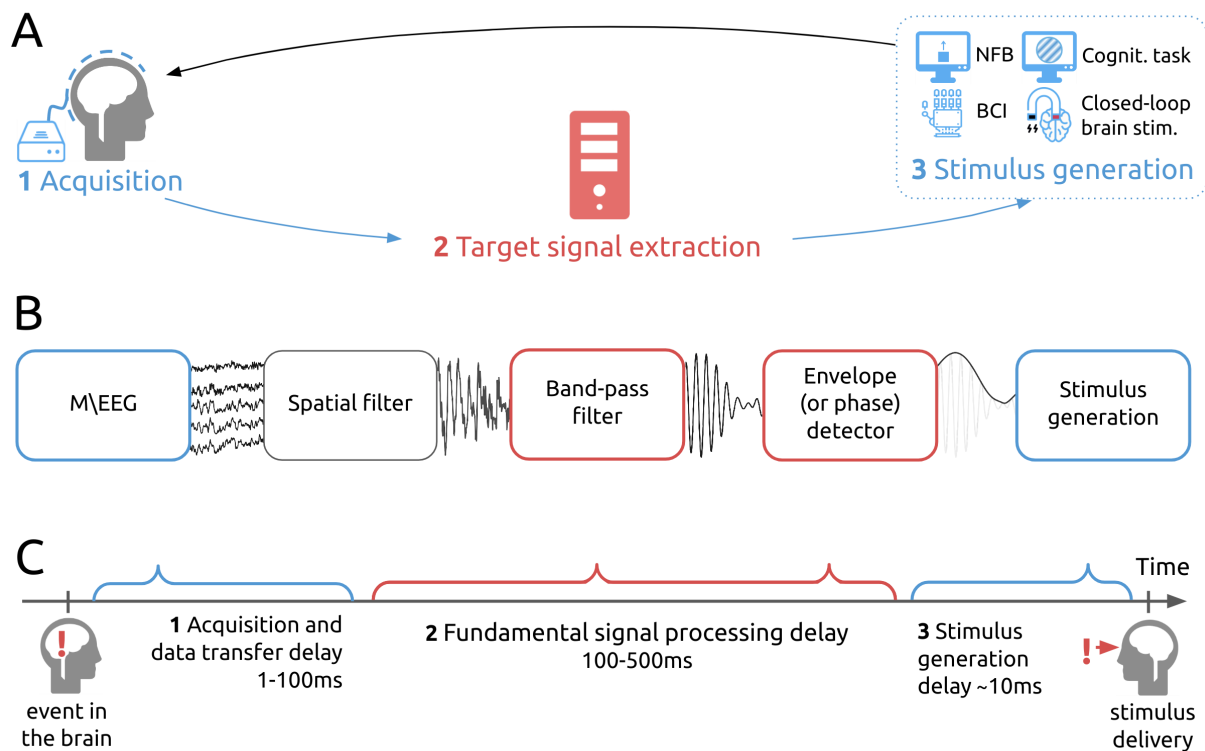

Figure 1: Schematics of the BRC paradigm. A. A diagram depicting signal flow in a closed-loop system. B. Signal processing pipeline. C. The sources of delays mounting to the total latency of the BRC system. Technical and fundamental sources of the delay are marked in blue and red, respectively.

47 Many implementations of BRC paradigm have been developed, which allow implementation of a variety of goal-  
48 directed behaviors dependent on a closed-loop design [3]. The most distinct paradigms are: neurofeedback (NFB),  
49 brain computer interface (BCI), closed-loop brain stimulation, and brain state-contingent stimulus delivery.

50 The NFB is a form of biofeedback that enables subjects with the capacity to monitor and control their own brain  
51 activity [4]. With NFB, subjects gain access to the neural signals of different brain structures, and learn to modulate  
52 them in specific ways [5], [6], [4], [7]. NFB approach is used as a therapy for neurological disorders [8], [9] and as  
53 cognitive enhancement therapy [10]. Steps of NFB operation include extraction of neural features of interest, their  
54 transformation using case-specific algorithms, and generation of sensory feedback delivered to the subject.

55 *BCIs* operate very much like NFB, with neural activity being recorded, processed, and directed to an external device  
56 that provides some sort of feedback to the subject. Yet, the emphasis here is not on the feedback per se but on the  
57 brain control of the device, which serves some useful purpose, for example a computer cursor or a prosthetic limb  
58 [11]. Clinically relevant BCIs are intended for functional restoration and rehabilitation of patients with neurological  
59 disabilities. For example, an EEG-based, motor-imagery BCI that controls a hand exoskeleton aids in rehabilitation of  
60 stroke patients [12], [13] by facilitating Hebbian plasticity that occurs owing to synchronization of cortical modulations  
61 with proprioceptive feedback caused by exoskeleton movements [14].

62 In BRC paradigms with *closed-loop brain stimulation*, parameters of neural oscillations, most often instantaneous  
63 amplitude and phase, affect the characteristics of stimulation directly applied to the brain [15]. Electromagnetic  
64 devices are commonly used to deliver the stimulation, which can be invasive, such as deep brain stimulation (DBS)  
65 [16], or noninvasive, such as transcranial brain stimulation (TBS) [17]. Thus, EEG oscillatory patterns have been  
66 used to control such types of TBS as transcranial magnetic stimulation (TMS) [18] and transcranial alternating current  
67 stimulation (tACS)[19]. BRC paradigms with stimulation through normal senses can be considered a type of closed-  
68 loop brain stimulation, as well, for example, stimulation with continuously flashing visual stimuli[20].

69 BRC paradigms have gained popularity, where cognitive processes are investigated under experimental conditions with  
70 *brain rhythm-contingent stimulus delivery*. This is because the brain handles cognitive tasks differently depending on  
71 the brain oscillatory patterns taking place just before the task onset [21, 22, 23, 24, 25, 26, 27]. Accordingly, it is of  
72 interest to create an experimental paradigm, where the task starts only after a particular oscillatory pattern is detected.  
73 Such brain rhythm-contingent stimulus delivery can drastically reduce experimental time and minimize participants'  
74 fatigue, particularly when the neural patterns of interest are represented by short-lived bursts of activity [28] or desired  
75 brain states[29].

## 76 1.2 Signal processing and latency in BRC paradigms

77 Despite the conceptual differences between the four applications of the BRC paradigm described above, their signal  
78 processing pipelines are quite similar and can be summarized as shown in Figure 1B.

79 In this paper, we consider the BRC paradigms based on EEG and MEG recordings. The major advantage of these  
80 imaging techniques over those that employ metabolic (e.g., positron-emission tomography) or blood oxygenation  
81 level-dependent (e.g., functional magnetic resonance imaging) measurements is their unsurpassed millisecond-scale  
82 temporal resolution. This fine temporal resolution allows exploring fine rhythmic structure of brain activity and, in  
83 principle, enables nearly instantaneous interaction with the brain circuits. Yet, as explained in detail below, time-lags  
84 of both technical and fundamental nature occur during the online extraction of oscillatory parameters from the ongoing  
85 brain activity. These lags vary from one implementation to another and can be significantly reduced with the use of  
86 appropriate signal processing methods.

87 For a BRC paradigm to be efficient, it needs to be temporally specific, that is feedback should be issued when it  
88 can affect the targeted neuronal activity. Temporal specificity of a BRC system is characterized by an overall delay  
89 between the onset of the neural event of interest and the time when the participant receives the stimulus corresponding  
90 to this event (Figure 1C. This delay, called the overall BRC system latency, incorporates time-lags related to different  
91 factors, some of them technical (i.e. software and hardware delays) and some fundamental (i.e. required to collect a  
92 sufficient amount of neural data).

93 The technical time-lags typically do not exceed 100 ms; this time is needed for hardware communication and low-level  
94 software processing. This delay can be reduced by specific hardware and software solutions. Based on our experience,  
95 it is feasible to reduce the technical delay to 20-30 ms.

96 The fundamental lag cannot be reduced that easily because it is composed of the time needed to collect a snapshot of  
97 neural oscillatory data that could be then quantified with an appropriate algorithm like band-pass filtering followed  
98 by the extraction of information about the instantaneous power or phase of the narrow-band process. If suboptimal

99 approaches are used for extracting power and/or phase of rhythmic neural components, the fundamental delay amounts  
100 to approximately 0.5 s, causing undesirable effects in BRC implementations.

101 The adverse effect of feedback delays has been reported in many NFB and the BCI studies, where participants learned  
102 to properly modulate their own brain activity, with or without a strategy recommended by the experimenter [30]. A  
103 similar problem with long feedback delays has been known from the studies on evidence-based learning. Thus, back  
104 in 1948, Grice showed that learning to discriminate complex visual patterns drastically depended on the feedback  
105 signal latency [31]. Impaired performance with delayed has been also demonstrated in the studies on motor learning  
106 e.g for the prism adaptation task [32]. According to Rahmandad et al. [27], behavioral learning is impaired when  
107 feedback delay is unknown. Moreover, elongated feedback delay decreases the sense of agency during BCI control  
108 [33], the finding also corroborated by a simulation study [34] showing that feedback delay and temporal blur adversely  
109 influence the automatic (strategy free) learning.

110 Temporal specificity is also an an important consideration for the experimental settings with closed-loop brain stim-  
111 ulation and brain state triggered stimulus delivery. Indeed, the key requirement for these methods are the accurate  
112 estimation of instantaneous oscillatory features and the timely delivery of the stimuli to efficiently interfere with the  
113 oscillatory neural patterns.

### 114 1.3 Low-latency method for envelope and phase detection

115 In the present study, we explore several approaches aimed at reducing the delay between neuronal events and the cor-  
116 responding feedback in the BRC paradigm. We propose a simple method to directly control the delay. Our algorithm is  
117 based on the adaptive optimization of the complex-valued finite impulse response (FIR) filter weights to yield the de-  
118 sired reduction of delay. The proposed approach is capable of extracting the instantaneous power and phase of neural  
119 oscillations with the shorter latency and higher accuracy as compared to other relevant techniques. With this approach,  
120 the user can explicitly specify the desired delay and assess the corresponding accuracy of envelope estimation. These  
121 features of the algorithm allow for flexible control of the latency-accuracy trade-off in BRC applications. Strikingly,  
122 our approach can work even with negative delays, paving way for achieving predictive feedback.

## 123 2 Methods

124 Our basic assumption is that the measured neural activity  $x[n]$  is a sum of the narrow-band signal  $s[n]$  (targeted neural  
125 activity of a BRC paradigm) and background colored broad-band noise  $\eta[n]$ .

$$x[n] = s[n] + \eta[n] \quad (1)$$

126 The targeted neural activity  $s[n]$  can be represented as the real part of analytic signal  $y[n]$  [35] :

$$y[n] = s[n] + js_h[n] = a[n]e^{j\phi[n]} \quad (2)$$

127 where  $s_h[n]$  is the imaginary part of the analytic signal, often called “second quadrature” of the original signal  $s[n]$ ,  
128  $a[n]$  is the envelope, reflecting the instantaneous power of the narrow band process at time stamp  $n$ , and  $\phi[n]$  is its  
129 instantaneous phase at the time stamp  $n$ . Importantly, once the estimate of the complex valued analytic signal  $y[n]$  is  
130 available that corresponds to signal  $s[n]$ , the envelope  $a[n]$  and the phase  $\phi[n]$  of  $s[n]$  can be computed as

$$a[n] = \sqrt{\Re\{y[n]\}^2 + \Im\{y[n]\}^2}, \phi[n] = \text{atan} \left( \frac{\Im\{y[n]\}}{\Re\{y[n]\}} \right) \quad (3)$$

131 Figure 2A shows that, with these expressions, extraction of the ground-truth signal is not restricted to causal operations.  
132 This is because the discrete Fourier transform (DFT) and narrow-band Hilbert transform in the frequency domain can  
133 be applied to the entire batch of data, followed by the conversion of the real and imaginary components of the analytic  
134 signal into the ground-truth values of the instantaneous envelope  $a[n]$  and phase  $\phi[n]$ .

135 In addition to the non-causal approach illustrated in Figure 2, the other panels of Figure 2 show a graphical summary  
136 of the available causal techniques that can be applied in real time to compute the envelope and instantaneous phase of  
137 a narrow-band component extracted from a broad-band signal.

### 138 2.1 Existing methods

139 For didactic purposes, we start with the most basic approaches.

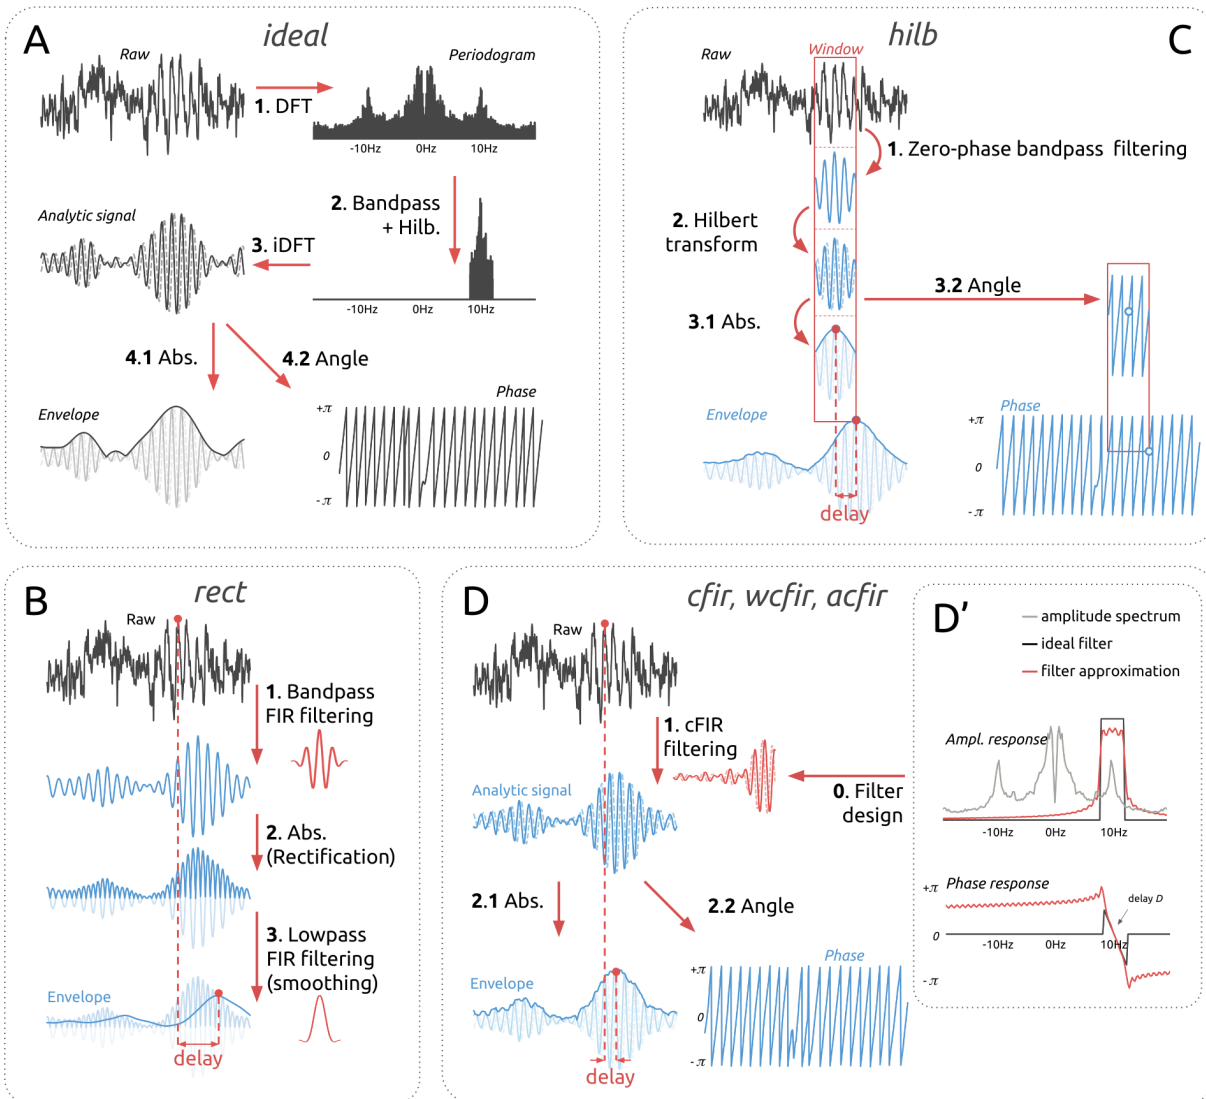

Figure 2: Methods for narrow-band signal envelope estimation. A. Ideal non-causal system for ground truth signal extraction. B. Envelope detector based on rectification of the band-filtered signal. C. Sliding window narrow-band Hilbert transform-based method. D. cFIR family filters that perform finite impulse response causal filter approximation of ideal non-causal systems. D'. Filter design for cFIR family filters.

140 **Rectification and smoothing of the band-filtered signal (*rect*)** is the conceptually most straightforward way to  
 141 estimate the envelope  $a[n]$ . In this method, low-pass filtering is performed applied to the rectified narrow-band filtered  
 142 signal. This approach can be mathematically expressed as:

$$a_r[n] = h_{lp}[n] * \left| h_{bp}[n] * x[n] \right| \quad (4)$$

143 where  $*$  is the convolution operator,  $h_{bp}$  is the impulse response of the band-pass filter,  $|\cdot|$  denotes the absolute  
 144 value (i.e., the rectification step), and  $h_{lp}$  is the impulse response of the low-pass filter that performs smoothing of the  
 145 rectified signal. Without loss of generality, we can assume that both  $h_{bp}$  and  $h_{lp}$  are linear phase FIRs designed by a  
 146 Hanning window method with the number of taps  $N_{bp}$  and  $N_{lp}$ , correspondingly. The cutoff frequency for the low-  
 147 pass filter  $f_c$  is set to correspond to one-half the expected bandwidth of the narrow-band process, i.e.  $f_c = (f_2 - f_1)/2$ .  
 148 FIR filters have a linear phase and therefore the total delay  $D$  and the number of taps in the individual filters  $N_{bp}$  and  
 149  $N_{lp}$  have the following interrelationship:

$$D = \frac{N_{lp} - 1}{2} + \frac{N_{bp} - 1}{2} \quad (5)$$

150 In order to ensure that the maximum performance is achieved for a given group delay value  $D$ , we used grid search  
 151 over variables  $N_{bp}$  and  $D$  in our comparative analysis. The parameter  $N_{lp}$  was determined from the formula 5. Since  
 152  $N_{bp}$  and  $N_{lp}$  are positive, this method can estimate the envelope values only with a positive delay, which corresponds  
 153 to the count of signal samples taken from the past.

154 **Sliding window narrow-band Hilbert transform (*hilb*)** is the second most commonly used method that is based  
 155 on the use of the analytic signal  $y[n]$  computed using Hilbert transform [35]. There are various implementations of  
 156 this approach. In the current work we resorted to the use of the windowed DFT. DFT is calculated on each window  
 157 of length  $N_t$  which is zero-padded to the length of  $N_f$  samples. Next, the coefficients corresponding to the negative  
 158 frequency values and those in the positive frequency semi-axis that fall outside the band of interest are zeroed out.  
 159 The DFT coefficients within the band of interest are doubled. Then, the inverse DFT is performed and  $N_t - D$ -th  
 160 element of the resultant complex valued sequence is used as an estimate of the analytic signal with delay  $D$ . This way,  
 161 two operations are performed simultaneously: band-pass filtering and extracting the analytic signal that is then used  
 162 to estimate the envelope. This algorithm is illustrated in Figure 2.

163 In matrix representation and using temporal embedding to form vector,  $\mathbf{x}[n]$  this can be written as:

$$y_h[n] = \frac{2}{N_f} \cdot \mathbf{w}_{N_t-D}^* \mathbf{W}_{\Delta f} \mathbf{x}[n], \quad (6)$$

164 where vector  $\mathbf{x}[n]$  contains the last  $N_t$  samples of  $x[n]$ , i.e.  $\mathbf{x}[n] = [x[n], x[n-1], \dots, x[n-N_t+1]]$ ,  $\mathbf{W}_{\Delta f}$  is the  
 165  $N_f$ -by- $N_t$  modified DFT matrix with zeros on the  $k$ -th row for  $k$  outside of  $[f_1 N_f / f_s, f_2 N_f / f_s]$  range corresponding  
 166 to the physical band of interest  $\Delta f = [f_1, f_2]$  and  $\mathbf{w}_{N_h-D}$  is the  $(N_h - D)$ -th row of the DFT matrix.

167 The parameters to be optimized for this method are window length  $N_t$  and zero-padded length of the signal  $N_f$  which  
 168 is used to perform the DFT. The overall delay of this method is explicitly determined by parameter  $D$ .

169 **Sliding window Hilbert transform with AR prediction of the narrow-band filtered signal (*ffiltar*)** was proposed  
 170 by Chen et al. [36] and applied practically [18]. In this method, the sliding window vector  $\mathbf{x}[n]$  containing  $N_a$  last  
 171 samples is forward-backward band-pass filtered. Then, flanker  $N_e$  samples are truncated to eliminate edge artifacts,  
 172 and  $2N_b$  samples are forward predicted by using an AR model fitted to  $N_a - N_e$  samples. Finally, Hilbert transfor-  
 173 mation of prediction is used to estimate the analytic signal value in the middle of the predicted range. In the original  
 174 work, this value was used to determine the current phase and time for stimulation. Here we used this technique as a  
 175 benchmark for our and other methods being compared but only at the processing latency  $D = 0$ , that is the latency  
 176 this approach was originally designed for.

177 Using matrix notation, we can formalize this method as follows.

$$y_p[n] = \frac{2}{N_f} \cdot \mathbf{w}_{N_a}^* \mathbf{W}_+ \mathcal{P}_{AR(p)} \{ \tilde{\mathbf{x}}[n] \} \quad (7)$$

178 where  $\tilde{\mathbf{x}}[n]$  contains forward-backward filtered last  $N_a$  samples of the  $x[n]$ ,  $\mathcal{P}_{AR(p)}$  denotes AR model based pre-  
 179 diction operation and adds  $2N_e$  predicted samples by using a  $p$ -th order AR model,  $\mathbf{W}_+$  is the  $N_f$ -by- $(N_a + N_e)$   
 180 modified DFT matrix with zeros on the rows corresponding to the negative frequencies and  $\mathbf{w}_{N_a}$  is the  $(N_a)$ -th row  
 181 of the DFT matrix. As the narrow-band filter for the forward-backward filtering part, we use Butterworth filter of the  
 182 order  $k$  as suggested in [36].

183 One of the disadvantages of this approach is that it has multiple parameters that need to be tuned to achieve the  
 184 optimal performance. To attain the best performance in this study, we searched over the parameter grid composed of  
 185 the following variables: AR order  $p$ , number of edge samples  $N_e$ , and Butterworth filter of the order  $k$ .

## 186 2.2 Proposed method

187 In order to build the analytic signal  $y[n]$  that corresponds to the narrow-band signal  $s[n]$  extracted from the noisy broad-  
 188 band measurements  $x[n]$ , one can apply the ideal narrow-band Hilbert transform filter [37, 38]. The complex-valued  
 189 frequency response of this combined filter can be defined as:

$$H_D(e^{jw}) = \begin{cases} 2e^{-jwD}, & w \in [w_c - \delta w, w_c + \delta w] \subseteq [0, \pi] \\ 0, & \text{otherwise} \end{cases} \quad (8)$$

190 where  $\delta w = 2\pi\delta f$  is half of the pass band width, and  $D$  is the group delay measured in samples. Strictly speaking,  
 191 for any finite delay  $D$  this filter is non-causal and cannot be applied in real time. To reconstruct the analytic signal  
 192 causally, one can find a causal complex-valued finite impulse response (cFIR) filter  $\mathbf{b} = \{b[n]\}$  of length  $N_t$  that  
 193 approximates the ideal complex valued frequency response  $H_D(e^{jw})$  [39]. This filter can be then applied in real-time  
 194 as  $y_c[n] = x[n] * b[n]$ , the procedure that incurs a fixed processing delay of  $D$  samples.

195 Causal complex valued FIR  $b[n]$  can be found by solving the least squares optimization problem. Various definitions  
 196 of the cost functions lead to different filters.

197 **Frequency domain least squares (cFIR)** is the first and most straightforward approach (denoted F-cFIR). The least  
 198 squares filter design strategy consists in finding the complex valued vector of the cFIR filter weights  $\mathbf{b}$  of length  $N_t$  that  
 199 minimizes the  $L_2$  norm between the cFIR filter frequency response obtained by the DFT and the discrete appropriately  
 200 sampled version  $\mathbf{h}_D$  of an ideal response  $H_D$  in the frequency domain. To increase the frequency resolution, we  
 201 use truncated  $N_f$ -samples DFT-matrix  $\mathbf{W}$  with dimension  $N_f \times N_t$  ( $N_f \geq N_t$ ). The use of transform matrix-based  
 202 formulation of the DFT in this case is equivalent to the DFT of  $N_t$  samples long vector zero-padded to length  $N_f$ .  
 203 Taking in account the fact that due to orthogonality  $\mathbf{W}^H\mathbf{W} = N_f\mathbf{I}$  the solution  $\mathbf{b}_F$  of the normal equation for the  
 204 optimization problem (2.2) can be found by a simple inverse DFT (9) of the desired complex valued characteristics of  
 205 the narrow-band Hilbert transformer.

$$\mathbf{b}_{cFIR} = \arg \min_{\mathbf{b}} \|\mathbf{W}\mathbf{b} - \mathbf{h}_D\|_{L_2}$$

$$\mathbf{b}_{cFIR} = \frac{1}{N_f} \mathbf{W}^H \mathbf{h}_D \quad (9)$$

206 The last formula 9 is equivalent to expression 6 but can be used with negative delays,  $D \leq 0$ . This simple method,  
 207 however, does not take into account the second order frequency domain statistics of the target signal and could be  
 208 further improved. Note that the cFIR approach with parameters  $N_t$ ,  $N_f$  and  $D \geq 0$  matches the sliding window  
 209 narrow-band Hilbert transform approach with the same parameters  $N_t$ ,  $N_f$  and  $D$ .

210 **Frequency domain weighted least squares (wcFIR)** is the method that follows optimal filter design ideas, where  
 211 power spectral density of the input signal  $x[n]$  are used as weights. We thus formulate the weighted frequency domain  
 212 least squares design technique (denoted wcFIR) via optimization problem (2.2) whose solution can be found by solving  
 213 the normal equations (10):

$$\mathbf{b}_{wcFIR} = \arg \min_{\mathbf{b}} \|\mathbf{X}(\mathbf{W}\mathbf{b} - \mathbf{h}_D)\|_{L_2}$$

$$\mathbf{b}_{wcFIR} = (\mathbf{W}^H \mathbf{X}^T \mathbf{X} \mathbf{W})^{-1} \mathbf{W}^H \mathbf{X}^T \mathbf{X} \mathbf{h}_D \quad (10)$$

214  
 215 where  $\mathbf{X}$  is the diagonal matrix formed from the square roots of the power spectral density magnitudes of  $x[n]$ . The  
 216 temporal dimension of  $\mathbf{W}$  is set according to the specified delay  $D$  by cropping  $\mathbf{W}$  from the full-blown twiddle-factor  
 217 matrix. Therefore only  $\mathbf{W}^H\mathbf{W} = N_f\mathbf{I}$  holds true while  $\mathbf{W}\mathbf{W}^H \neq N_f\mathbf{I}$ . This way, at the optimum  $\|\mathbf{W}\mathbf{b} - \mathbf{h}_D\| \neq 0$   
 218 and therefore  $\mathbf{b}$  is just an approximation of the ideal filter and can be computed even for negative  $D$ .

219 Panels D and D' of Figure 2 illustrate these two approaches. The delay  $D$  corresponds to the slope of the phase  
 220 response within the pass-band and theoretically can be set to an arbitrary value. Then, the optimization procedure  
 221 aims at finding such complex vector of cFIR filter coefficients  $\mathbf{b}$  that both ideal phase response and an ideal amplitude  
 222 response are approximated sufficiently and accurately. We do so in the frequency domain by analytically solving the  
 223 least squares or the weighted least squares problems.

224 Conceptually, having in mind the two tasks of optimal envelope and instantaneous phase estimation we could have  
 225 formulated the two separate optimization problems and used two different sets of weights implementing two different  
 226 band-pass complex-valued filters delivering optimal accuracy in estimation of envelope and phase approximation with  
 227 the specified delay. In this case, however, due to non-linearity of the target functional, we would have to perform an  
 228 iterative optimization in order to find the optimal FIR filter weights vector  $\mathbf{b}$ .

229 **Time domain least squares** is the last approach from this family (denoted tcFIR) that is based on minimization of  
 230 the squared distance in the time domain between the complex delayed ground truth signal  $y[n - D]$  and the filtered  
 231 signal  $x[n] * b[n]$ :

$$\mathbf{b}_{tcFIR} = \arg \min_{\mathbf{b}} \|x[n] * b[n] - y[n - D]\|_{L_2} \quad (11)$$

232 In this case, the ground truth signal  $y[n-D]$  is obtained non-causally from the training samples via an ideal zero-phase  
 233 Hilbert transformer (8). According to Parseval's theorem, this approach is equivalent to the wcFIR approach. However  
 234 in contrast to the frequency domain formulation, it allows for implementation of recursive schemes for solving (11)  
 235 and therefore may potentially account for non-stationarity in the data. One of the most straightforward approaches is  
 236 to use recursive least squares (RLS) [40], to update filter coefficients on the fly.

### 237 2.3 Methods comparison

238 **Data and preprocessing** We compared the described methods using resting state EEG data recorded from 10 sub-  
 239 jects during NFB training sessions. EEG recordings were performed using 32 AgCl electrodes placed according to  
 240 a 10-20-system with the ground electrode at AFz position and reference electrodes on both ears. The impedance for  
 241 all electrodes was kept below 10 KOhm. The signal was sampled at 500 Hz using the NVX-136 amplifier (Medical  
 242 Computer Systems Ltd.) and bandpass-filtered in 0.5-70 Hz band. These *preprocessing* filters incurred overall delay  
 243 of no more than 10 milliseconds in the bandwidth of interest (8-12Hz).

244 For each subject, we used 2 minutes of resting state recordings. The first minute of the data – for training or the  
 245 parametric grid search and the second minute is used for testing the performance. To eliminate eye artifacts we  
 246 performed independent component analysis (ICA) on the training data, identified eye-movement related components  
 247 by means of the mutual information spectrum [41] and removed from the data several components exhibiting the  
 248 highest mutual information with either of the two frontal channels Fp1 and Fp2.

249 For the following analysis only parietal P4 channel of the cleaned data is used as feedback signal  $x[n]$  in (1).

250 **Individual alpha band** We determine individual alpha range by the following procedure: estimate power spectrum  
 251 using Welch method with 2 second 50%-overlap boxcar window, find the frequency  $f_0$  with maximal SNR in the  
 252 8-12Hz range, define individual band as  $[f_1, f_2]$  interval, where  $f_1 = f_0 - 2$  Hz and  $f_2 = f_0 + 2$  Hz.

253 **Ground truth signal** As the ground truth signal  $s[n]$  in (1), we used non-causally computed analytic signal obtained  
 254 by zeroing out the DFT coefficients corresponding to the frequencies of the individual alpha band  $[f_1, f_2]$  followed  
 255 by the Hilbert transform. Once we have the analytic signal, we can estimate both envelope and instantaneous phase  
 256 without any additional delay.

257 **Performance metrics** To measure the accuracy of the envelope and instantaneous phase estimates obtained with  
 258 the described techniques as a function of the group delay  $D$  we used the following metrics. All metrics are based on  
 259 the ground truth envelope and instantaneous phase information extracted from the ground truth signal  $s[n]$  extracted  
 260 non-causally from the real EEG data as described above and then shifted to match the specific delay value  $D$  of  
 261 causal processing. We will denote the shifted ground truth envelope and phase sequences as  $a[n-D]$  and  $\phi[n-D]$   
 262 correspondingly.

263 For performance assessment of envelope estimation methods, we calculated the Pearson correlation coefficient be-  
 264 tween estimated envelope  $\hat{a}[n]$  obtained causally by each of the methods and the appropriately shifted ground truth  
 265 envelope sequence  $a[n-D]$ :

$$r_a = \frac{\sum_{n \in \mathcal{N}_a} (a[n-D] - m_a)(\hat{a}[n] - m_{\hat{a}})}{\sqrt{\sum_{n \in \mathcal{N}_a} (a[n-D] - m_a)^2} \sqrt{\sum_{n \in \mathcal{N}_a} (\hat{a}[n] - m_{\hat{a}})^2}} \quad (12)$$

266 where  $\mathcal{N}_a = D..N-1$  is the set of time indices with  $N = 30000$ ,  $m_a$  and  $m_{\hat{a}}$  are sample means averages of  $a[n]$  and  
 267  $\hat{a}[n]$  over set  $\mathcal{N}_a$

268 To asses performance of instantaneous phase estimation we used bias  $b_\phi$ , absolute bias  $|b_\phi|$  and the standard deviation  
 269  $\sigma_\phi$  of the delayed ground truth phase  $\phi[n-D]$  at the time moments when predicted  $\hat{\phi}[n]$  phase crosses 0. These  
 270 metrics reflect the bias, absolute bias, and the variance in determining zero-crossing moments (negative-to-positive  
 271 direction) of the delayed signal  $s[n-D]$ .

$$b_\phi = \frac{1}{|\mathcal{N}_\phi|} \sum_{n \in \mathcal{N}_\phi} \phi[n-D] \quad (13)$$



| Method           | Param.   | Grid           |
|------------------|----------|----------------|
| <i>rect</i>      | $N_{bp}$ | 0, 5, ..., 100 |
| <i>cfir/hilb</i> | $N_t$    | 250, 500, 1000 |
| <i>wcfir</i>     | $N_t$    | 250, 500, 1000 |
| <i>acfir</i>     | $N_t$    | 250, 500, 1000 |
|                  | $N_u$    | 25, 50         |
|                  | $\mu$    | 0.7, 0.8, 0.9  |
| <i>ffiltar</i>   | $p$      | 10, 25, 50     |
|                  | $N_e$    | 10, 25, 50     |

Table 1: Grid search space for each method.

$$\sigma_\phi = \sqrt{\frac{1}{|\mathcal{N}_\phi| - 1} \sum_{n \in \mathcal{N}_\phi} (\phi[n - D] - b_\phi)^2} \quad (14)$$

272 where  $\mathcal{N}_\phi = \{n : n \in \mathcal{N}_a, \text{sign}(\hat{\phi}[n]) > \text{sign}(\hat{\phi}[n - 1])\}$  is the set of time moments when  $\hat{\phi}[n]$  crosses 0.

273 **Grid search procedure** To ensure that the compared methods operate optimally, for each of them, we defined grid  
 274 search space as described in table 1 and, as described below, looked for the combination of parameters that ensured the  
 275 best performance for each of the techniques. Here we use the following short method names: *rect* for envelope detector  
 276 based on rectification of the band-filtered signal, *cfir* for the frequency domain least squares designed cFIR, *wcfir* for  
 277 the frequency domain weighted least squares designed cFIR and *acfir* for RLS based cFIR filter update scheme. Note  
 278 that sliding window narrow-band Hilbert transform approach (*hilb*) exactly matches the *cfir* on the range of positive  
 279 delays.

280 For each combination of parameters and fixed delay  $D$ , we computed the metrics defined above on the training set  
 281 separately for each subject. Note that for *rect* and *hilb* no negative delay  $D$  is possible and for *ffiltar* we used  
 282 only zero delay ( $D = 0$ ) as this technique was formulated and used in the closed-loop experiments in this specific  
 283 condition. Frequency band and weights for the *wcfir* approach were computed based on the same training data. We  
 284 then used optimal values of parameters for each method corresponding to the maximum of  $r_a$ , minimum for  $|b_\phi|$  and  
 285 minimum of  $\sigma_\phi$  values observed on the training set, and estimated the same performance metrics  $r_a$ ,  $b_\phi$ ,  $|b_\phi|$  and  $\sigma_\phi$   
 286 on the test data.

### 287 3 Results

288 Figure 3 shows the performance comparison results averaged over the data for ten subjects for the methods explored  
 289 in this study. To ensure the best performance for each of the techniques, we used training data segments to tune each  
 290 method's parameters using the grid search procedure described in the Methods section. For each method in panels A,  
 291 B, C and D, we show the performance metrics  $r_a$ ,  $\sigma_\phi$ ,  $b_\phi$ ,  $|b_\phi|$  reflecting envelope correlation accuracy (panel A), phase  
 292 estimate variance (panel B), phase estimate bias (panel C) and phase estimate absolute bias (panel D) and described  
 293 by equations 12, 14 and 13 as observed on the test segments of the data with the optimal set of parameters identified  
 294 over the independent training segments. For each such metric, the curves display their mean values averaged over 10  
 295 subjects as a function of the incurred delay. The error bars indicate the 95% confidence intervals obtained with 1,000  
 296 bootstrap iterations.

297 As expected and according to Figure 3.A, the envelope estimation accuracy quantified by the correlation coefficient  
 298  $r_a$  deteriorates as the processing lag  $D$  decreases. The smaller the processing lag, the weaker is the correlation  
 299 between the non-causally obtained ground-truth envelope and the envelope estimated in real-time by each of the meth-  
 300 ods. Noticeably, for all positive delays *rect* approach (gray line) has the worst performance that makes it practically  
 301 unusable for latency values below 150 ms. Methods *cfir* (blue line), *wcfir* (red line) and *acfir* (light blue line)  
 302 exhibit comparable accuracy. The approach described in [36] (*ffiltar*, black dot) that entails AR modelling of data and  
 303 forward-backward filtering of the extended data chunk yields at zero latency the accuracy comparable to that delivered  
 304 by the proposed *cfir* family of methods but requires specification of parameters describing AR model order, filter and  
 305 extension window length and is significantly more intense computationally.

306 Panels B, C and D of Figure 3 show the results for real-time estimation of instantaneous phase as a function of  
 307 time-lag  $D$ . For the positive delay values, the bias  $b_\phi$  remains practically negligible and does not exceed  $5^\circ$  for all

308 considered methods. Noteworthy, the *ffiltar* approach has been formulated for zero-latency and its phase estimation  
 309 bias corresponding to  $D = 0$  hovers around zero. However, as panel D demonstrates, the absolute bias of the phase  
 310 estimate obtained by this technique is comparable to that delivered by the *cfir* family of methods and therefore close  
 311 to zero values of the bias reflects symmetric around zero distribution of the bias observed in the 10 datasets explored.  
 312 The methods from the *cfir* family exhibit a significant growth of phase estimation standard deviation (SD) as lag  $D$   
 313 decreases. Yet, at zero lag, the variance of the estimate delivered by the proposed here family of techniques appears to  
 314 be significantly below that of the state of the art method introduced earlier in [36] and successfully used in the number  
 315 of closed-loop stimulation studies. Here we reported the averaged observations made on the basis of the data recorded  
 316 from 10 subjects as described in Section 2.3. The comparative performance of the explored methods may line-up  
 317 differently for each of the datasets depending on the individual alpha-range SNR and other unaccounted factors.

318 This issue is clarified in Figure 4 that illustrates for individual subjects the same three performance measures as shown  
 319 in Figure 3 but only for  $D = 0$ . Separate consideration for each subject allowed us to explore the performance as a  
 320 function of SNR, which varied across individuals.

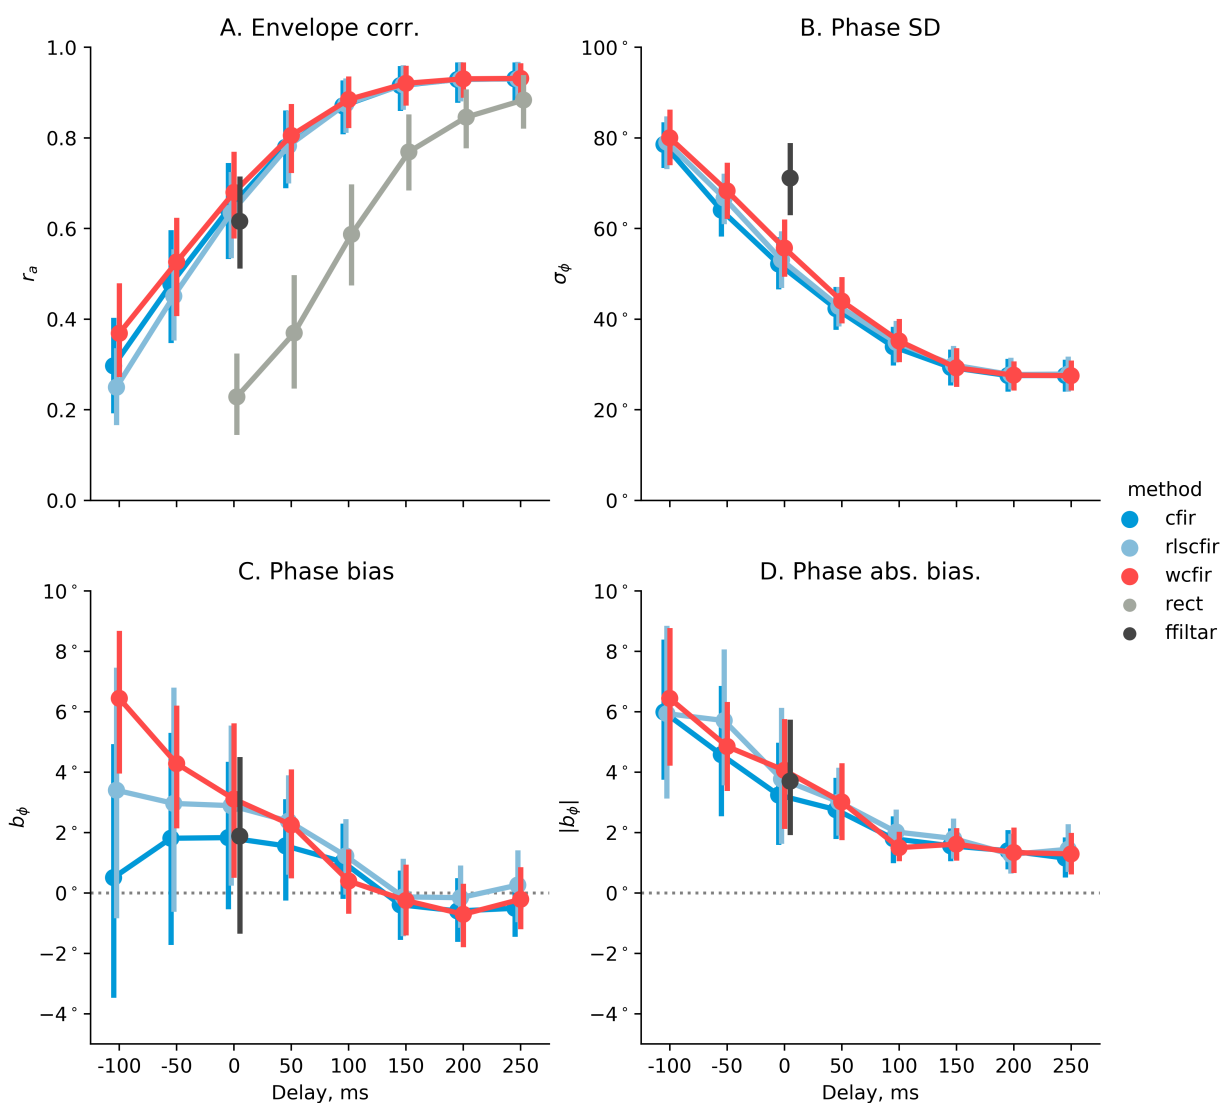

Figure 3: Four performance metrics vs incurred processing delay. A - dependence of the correlation coefficient  $r_a$  on delay  $D$  for the *cfir* family, for rectification based technique and AR-based extrapolation approach(*ffiltar*). B - phase estimation bias  $b_\phi$  as a function of processing delay  $D$ . C - phase estimation variance  $\sigma_\phi$  as a function of processing delay. D - phase estimation absolute bias  $|b_\phi|$  vs.  $D$

321 Figure 4 shows how the performance of the explored methods for  $D = 0$  as a function of the SNR observed in each of  
 322 the individual subjects. Metrics of the performance are the same as in Figure 3. For all methods envelope correlation  
 323  $r_a$  grows with SNR, panel A. Phase estimate standard deviation improves with SNR and appears to be consistently  
 324 lower for the *cfir* family of methods. Phase estimate bias  $b_\phi$  shows positive skew for the low SNR value. The absolute  
 325 bias for *ffiltar* technique appears to be independent of the SNR. For high SNR values starting with 1.0 the absolute  
 326 bias value obtained by all methods from the *cfir* family appears to be consistently lower than that of the *ffiltar*.

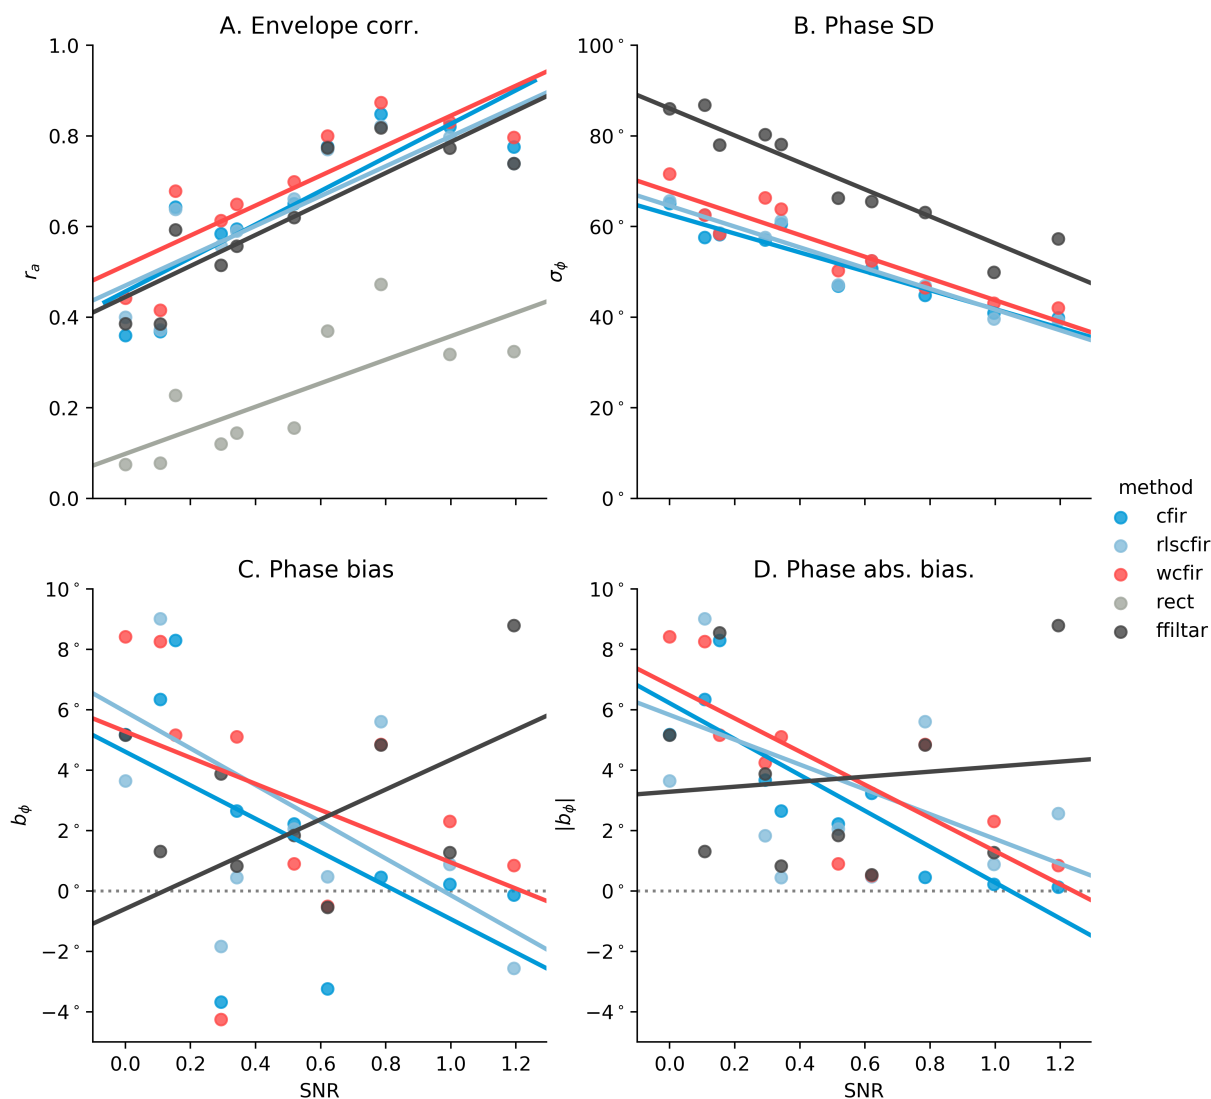

Figure 4: Four performance metrics vs. alpha rhythm SNR. A - envelope correlation coefficient  $r_a$ , B - phase estimation standard deviation (SD)  $\sigma_\phi$  and C,D - phase estimation bias  $b_\phi$  and absolute bias  $|b_\phi|$ . Each dot corresponds to a dataset and is positioned on the x-axis according to the P4 alpha-rhythm SNR.

327 In some versions of the closed-loop paradigms e.g. [24], a full-blown envelope reconstruction is not required. Instead,  
 328 of interest is the discrete detection of time moments with high instantaneous band power. The transition into the zone  
 329 of high instantaneous band power values may serve as a feedback or a trigger for either stimulus presentation or direct  
 330 brain stimulation act. Suppose we want to perform detection of the time when the instantaneous rhythm power exceeds  
 331 the 95% threshold. As shown in the left panel of Figure 5.A for the binary classification case the moments when the  
 332 envelope falls into the top area above the dashed line are labeled as *High* and the rest of the moments are labeled as  
 333 *Low*. The graph on the right panel of Figure 5.A shows balanced accuracy score (class recall average) for such binary  
 334 detection task as a function of allowed processing delay parameter  $D$ . The analysis is done for one subject with median  
 335 SNR selected from the pull of 10 subjects. We can observe that the best performance in the binary classification task is

336 achieved by the weighted *cfir* method with zero processing latency ( $D = 0$ ). Similar results for ternary classification  
 337 of the three-state problem are shown in Figure 5.B. Just like in the binary case, the moments when the envelope falls  
 338 into the top area corresponding to the 5% of the largest envelope values are labeled as *High* and additionally, label  
 339 *Low* is assigned to the time instances when the envelope takes on values from the lowest 5%. The rest of the time  
 340 moments are labeled as *Medium*. Interestingly, the *cfir* family of methods delivers the best performance for zero  
 341 processing delay  $D = 0$ . In the binary classification scenario, we can achieve about 75% of balanced accuracy. The  
 342 rectification-based approach at best provides just above 60% accuracy and that peaks in 100-150 ms processing lag  
 343 range. The results are qualitatively the same for the ternary classification case.

### A. High/Other

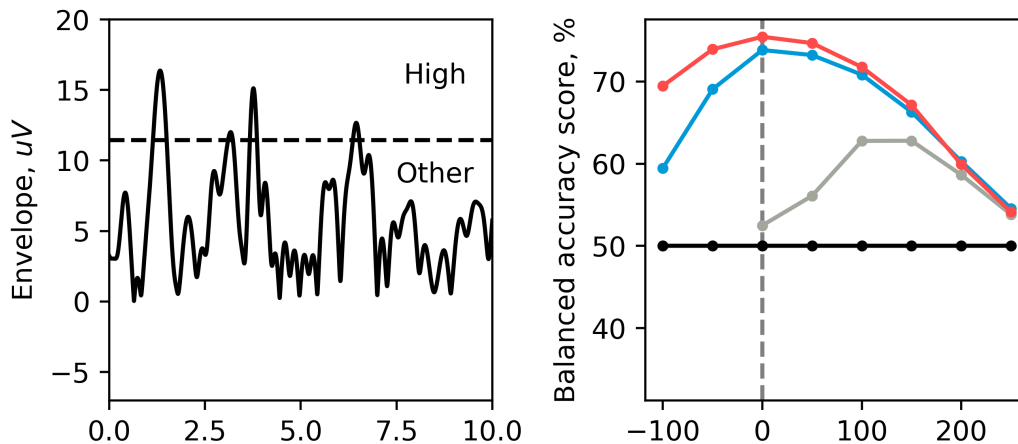

### B. High/Middle/Low

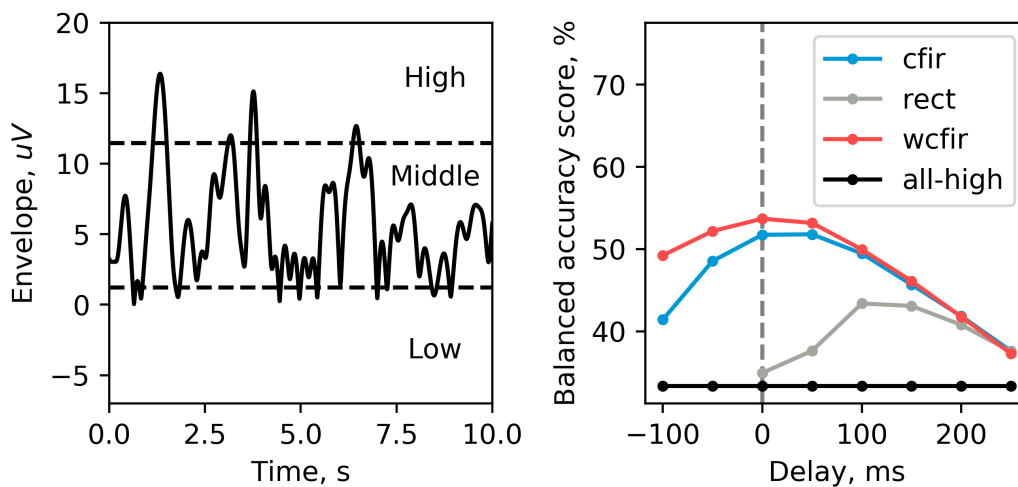

Figure 5: Discrete paradigm accuracy for one subject with median SNR. A) - binary classification task. The goal is to detect the time instances when alpha envelope is in the upper 5% quantile of its values. B) - ternary classification task to distinguish lower and upper 5% quantiles of the envelope values from the mid-range values falling into 5%-85% range.

344 Finally, to explore the morphology of the alpha-burst events in the *High/Other* classification task described above in  
 345 Figure 6, we averaged the ground truth envelope around moments when the decoder crossed its own threshold. This  
 346 computation was performed for *rect* and *wcfir* approaches for predefined delay parameters from [300, 100, 0, -100] ms  
 347 set (for *rect* only positive values were used). Also, we computed averaged envelope across a set of randomly picked

348 time moments (denoted as *rand*) and across moments when the ground truth envelope crossed the *High* threshold  
349 (denoted as *ideal*), which can not be done causally, see Figure 6.d

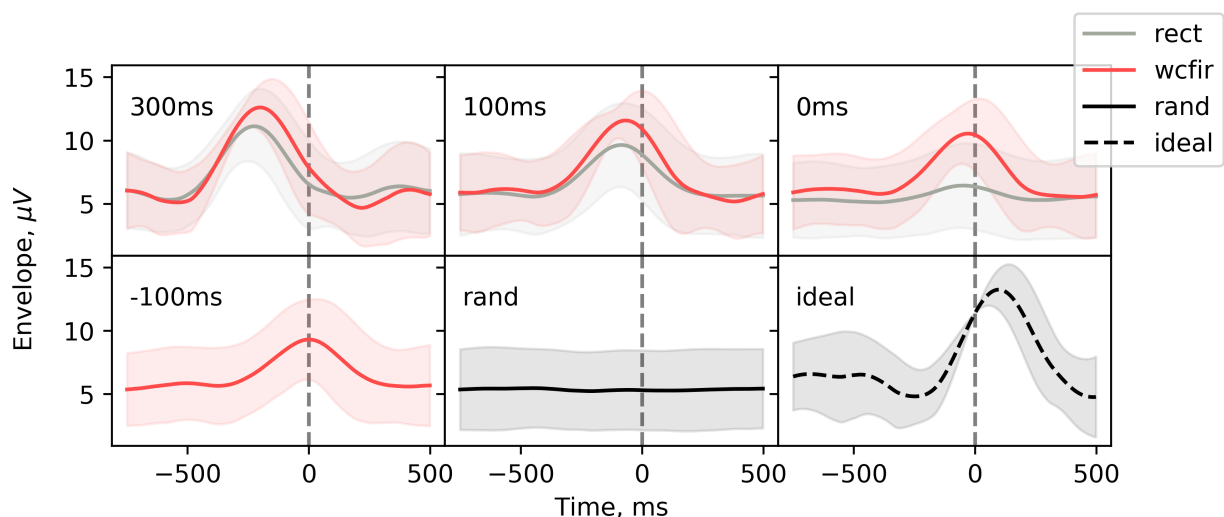

Figure 6: Average envelope computed using real-time detected markers of *High* events for different pre-specified processing delay values.

#### 350 4 Discussion

351 The standard techniques for estimating instantaneous power of EEG rhythms, such as the methods based on the  
352 rectification of narrow-band filtered signal and the STFT based algorithms, incur significant delays, hindering the  
353 performance of BRC systems. Such delays, combined with the lags of acquisition hardware and the time required  
354 for stimulus presentation, result in significant lags between the actual brain activity and the signal used to control  
355 the experimental flow in BRC paradigms and/or utilized as a feedback to the subject. In the closed-loop stimulation  
356 paradigms, this would mean that the timing of the stimulating pulse can not be accurately aligned to the desired  
357 feature of the oscillatory brain activity. In NFB setting or settings requiring an explicit feedback signal that reflects  
358 subject's performance, these standard approaches close the loop more than 300 ms past the targeted neural event [42].  
359 Such delays may be especially harmful when the targeted brain rhythm patterns can be described as discrete events  
360 of a limited duration [7], [43],[44], where the feedback can arrive after the event has completed. Such low temporal  
361 specificity of the feedback signal hinders learning, especially in the automatic learning scenarios [30].

362 Here we systematically explored a series of methods for minimizing latency in RBC systems. We distinguished  
363 a family of best-performing techniques that are based on the least-squares filter design. These methods allow for  
364 a simpler and more transparent control over the accuracy-versus-latency trade-off compared to the other existing  
365 approaches.

366 Our results confirm that the proposed methodology based on least-squares filter design noticeably reduces latency of  
367 EEG envelope and phase estimation. This procedure is simple; yet its performance pars or exceeds that of the more  
368 complex approaches, such as the one based on the use of the AR-model [36], the most ubiquitous method for closed-  
369 loop studies [45], [18],[46],[47]. With our method, users can specify the desired delay and achieve the best possible  
370 envelope estimation accuracy possible with a linear method. As evident from Figure 3, the spectral density weighted  
371 cFIR technique allowed us to generate zero-latency feedback that accurately tracked the instantaneous power profile  
372 of the EEG-rhythm. The performance of our method on a typical segment of data can be appreciated from Figure 7  
373 that shows true values and estimates of the envelope and phase obtained with cFIR method for various user specified  
374 lags.

375 We see this work as a systematic effort aimed at building a zero- or even negative-latency feedback systems that will  
376 allow transferring the predictive control methodology successfully exercised in technical systems to the tasks where  
377 the brain is the controlled object [48]. As shown in 5, *wcFIR* approach allows for correct forward prediction 100 ms  
378 ahead of rhythmic activity bursts, with AUC exceeding 70%. This illustration of the successful predictive behavior  
379 suggests that the proposed family of simple approaches together with the necessary hardware optimization will open

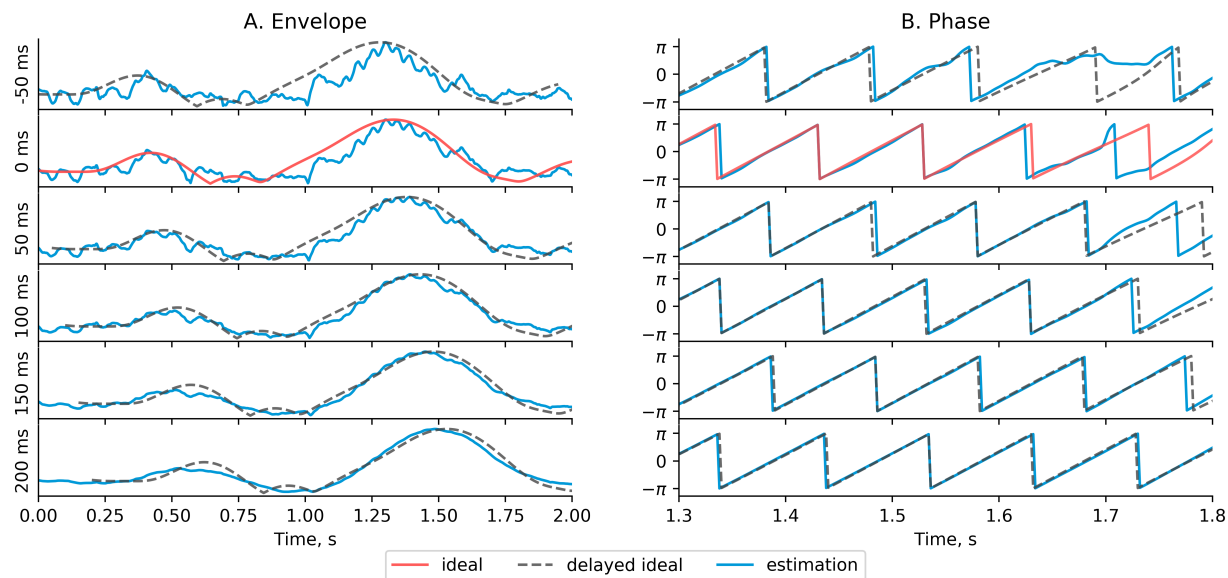

Figure 7: Envelope and phase estimates obtained by cFIR method (blue line) for different delay values  $D$ , each row corresponds to delays from -50ms to 200ms. Red line denotes ground-truth signal calculated by the ideal non-causal filter, gray dashed line denotes the same ground-truth signal but shifted by the corresponding delay  $D$  to facilitate comparison

380 up a way for the implementation of predictive control that enables a more efficient interaction with the functioning  
381 brain.

382 While our method reduces feedback latency, this reduction comes at a cost of less accurate envelope estimation.  
383 Deterioration of performance is especially sizeable in when the SNR is low and therefore, for the latency-reduction  
384 algorithm to be efficient, care should be taken to improve the SNR with such methods as spatial filtering of multi-  
385 electrode recordings.

386 The optimal latency-accuracy trade-off is the issue that needs to be addressed for each particular application and each  
387 particular subject. As shown in Figure 3, the methods outlined in this work allow the users to smoothly control this  
388 trade-off and choose the optimal operational point for each specific application.

389 As mentioned above, to achieve the true predictive scenario, though, the improvements need to be made not only of  
390 the signal processing algorithms but also of the hardware employed for signal acquisition, as well as the low-level  
391 software that handles EEG data transfer from the acquisition device to the computer memory buffer. To this end,  
392 it is worth considering specialized systems based on the FPGA programmable devices that eliminate the uncertain  
393 processing delays present in computer operating systems not designed to operate in real-time.

394 In the context of neurofeedback, additional consideration should be given to the physiological aspects of the sensory  
395 modality used to deliver the feedback signal. For instance, it is known that visual inputs, although very informa-  
396 tive [33], are processed slower compared to tactile inputs and therefore tactile feedback could be a better option for  
397 predictive control.

398 The signal processing approaches presented here could be advanced by employing more sophisticated decision rules  
399 capable of extracting the hidden structure from the data. Thus, convolutional neural networks [49],[50] and novel  
400 recursive architectures hold a significant promise to further improve the accuracy of real-time zero-lag envelope and  
401 phase estimation.

## 402 Acknowledgments

403 This work is supported by the Center for Bioelectric Interfaces NRU HSE, RF Government grant, ag.  
404 No.14.641.31.0003. We also thank Dr. Maria Volodina for the careful proofread of the final version of this manuscript.

## 405 References

- 406 [1] Buzsáki G. *Rhythms of The Brain*. Oxford Univ. Press, 2009.
- 407 [2] Paul L. Nunez and Ramesh Srinivasan. *Electric Fields of the Brain: The neurophysics of EEG*. Oxford University  
408 Press, January 2006.
- 409 [3] Müller-Dahlhaus F Ziemann U. Zrenner C, Belardinelli P. Closed-loop neuroscience and non-invasive brain  
410 stimulation: A tale of two loops. *Front Cell Neurosci.*, 2016.
- 411 [4] Sitaram R., Ros T., Stoeckel L., Haller S., Scharnowski F., Lewis-Peacock J., Weiskopf N., Blefari M., Rana M.,  
412 Oblak E., Birbaumer N., and Sulzer J. Closed-loop brain training: the science of neurofeedback. *Nature Reviews*  
413 *Neuroscience*, 2016.
- 414 [5] Serman M., MacDonald L., and Stone R. K. Operant control of the EEG alpha rhythm and some of its reported  
415 effects on consciousness. *Altered states of consciousness*, 1969.
- 416 [6] Serman M., MacDonald L., and Stone R. K. Biofeedback training of the sensorimotor electroencephalogram  
417 rhythm in man: effects on epilepsy. *Epilepsia*, 1974.
- 418 [7] Ossadtchi A., Shamaeva T., Okorokova E., Moiseeva V., and Lebedev M. Neurofeedback learning modifies the  
419 incidence rate of alpha spindles, but not their duration and amplitude. *Scientific Reports*, 2017.
- 420 [8] Lofthouse N., Hendren R., Hurt E., Arnold L. E., and E. Butter. A review of complementary and alternative  
421 treatments for autism spectrum disorders. *Autism research and treatment*, 2012.
- 422 [9] Coben R., Linden M., and Myers T.E. Neurofeedback for autistic spectrum disorder: a review of the literature.  
423 *Applied Psychophysiology and Biofeedback*, 2010.
- 424 [10] Zoefel B., Huster R. J., and Herrmann C. S. Neurofeedback training of the upper alpha frequency band in EEG  
425 improves cognitive performance. *Neuroimage*, 2011.
- 426 [11] Wolpaw J. et al. *Brain-computer interfaces: principles and practice*. Oxford Univ. Press, 2012.
- 427 [12] Frolov A., Kozlovskaya I., Biryukova E., and Bobrov P. Robotic devices in poststroke rehabilitation. *Zhurnal*  
428 *Vysshei Nervnoi Deyatelnosti Imeni I.P. Pavlova*, 2017.
- 429 [13] Ang K. K., Chua K. S., Phua K. S., Wang C., Chin Z. Y., Kuah C. W., Low W., and Guan C. A. Randomized  
430 controlled trial of EEG-based motor imagery brain-computer interface robotic rehabilitation for stroke. *Clinical*  
431 *EEG and neuroscience*, 2015.
- 432 [14] Moritz Grosse-Wentrup, Donatella Mattia, and Karim Oweiss. Using brain-computer interfaces to induce neural  
433 plasticity and restore function. *Journal of Neural Engineering*, 8(2):025004, mar 2011.
- 434 [15] Ahmed El Hady. *Closed Loop Neuroscience*. Elsevier, 2016.
- 435 [16] Chao-Hung Kuo, Gabrielle A. White-Dzuro, and Andrew L. Ko. Approaches to closed-loop deep brain stimula-  
436 tion for movement disorders. *Neurosurgical Focus*, 45(2):E2, aug 2018.
- 437 [17] Til Ole Bergmann, Anke Karabanov, Gesa Hartwigsen, Axel Thielscher, and Hartwig Roman Siebner. Combin-  
438 ing non-invasive transcranial brain stimulation with neuroimaging and electrophysiology: Current approaches  
439 and future perspectives. *NeuroImage*, 140:4–19, oct 2016.
- 440 [18] Schaworonkow N. and Zrenner C. Triesch J, Ziemann U. EEG-triggered TMS reveals stronger brain state-  
441 dependent modulation of motor evoked potentials at weaker stimulation intensities. *Brain Stimul.*, 12(1):110–  
442 118, 2019.
- 443 [19] Caroline Lustenberger, Michael R. Boyle, Sankaraleengam Alagapan, Juliann M. Mellin, Bradley V. Vaughn,  
444 and Flavio Fröhlich. Feedback-controlled transcranial alternating current stimulation reveals a functional role of  
445 sleep spindles in motor memory consolidation. *Current Biology*, 26(16):2127–2136, aug 2016.
- 446 [20] Gan Huang, Jia Liu, Linling Li, Li Zhang, Yixuan Zeng, Lijie Ren, Shiqing Ye, and Zhiguo Zhang. A novel  
447 training-free externally-regulated neurofeedback (ER-NF) system using phase-guided visual stimulation for al-  
448 pha modulation. *NeuroImage*, 189:688–699, April 2019.

- 449 [21] M. S. Nokia and J. Wikgren. Effects of hippocampal state-contingent trial presentation on hippocampus-  
450 dependent nonspatial classical conditioning and extinction. *Journal of Neuroscience*, 34(17):6003–6010, April  
451 2014.
- 452 [22] Ali Mazaheri, Martine R. van Schouwenburg, Andrew Dimitrijevic, Damiaan Denys, Roshan Cools, and Ole  
453 Jensen. Region-specific modulations in oscillatory alpha activity serve to facilitate processing in the visual and  
454 auditory modalities. *NeuroImage*, 87:356–362, February 2014.
- 455 [23] Johanna M. Zumer, René Scheeringa, Jan-Mathijs Schoffelen, David G. Norris, and Ole Jensen. Occipital al-  
456 pha activity during stimulus processing gates the information flow to object-selective cortex. *PLoS Biology*,  
457 12(10):e1001965, October 2014.
- 458 [24] Jason Samaha, Luca Iemi, and Bradley R. Postle. Prestimulus alpha-band power biases visual discrimination  
459 confidence, but not accuracy. *Consciousness and Cognition*, 54:47–55, September 2017.
- 460 [25] Mathis Kaiser, Daniel Senkowski, Niko A. Busch, Johanna Balz, and Julian Keil. Single trial prestimulus oscil-  
461 lations predict perception of the sound-induced flash illusion. *Scientific Reports*, 9(1), April 2019.
- 462 [26] Simon Hanslmayr, Alp Aslan, Tobias Staudigl, Wolfgang Klimesch, Christoph S. Herrmann, and Karl-Heinz  
463 Bäuml. Prestimulus oscillations predict visual perception performance between and within subjects. *NeuroImage*,  
464 37(4):1465–1473, October 2007.
- 465 [27] Rahmandad H., Repenning N., and Serman J. Effects of feedback delay on learning. *System Dynamics Review*,  
466 2009.
- 467 [28] Freek van Ede, Andrew J. Quinn, Mark W. Woolrich, and Anna C. Nobre. Neural oscillations: Sustained rhythms  
468 or transient burst-events? *Trends in Neurosciences*, 41(7):415–417, July 2018.
- 469 [29] Mark Lawrence Andermann, Jaakko Kauramäki, Tapio Palomäki, Christopher I. Moore, Riitta Hari, Iiro P.  
470 Jääskeläinen, and Mikko Sams. Brain state-triggered stimulus delivery: An efficient tool for probing ongoing  
471 brain activity. *Open journal of neuroscience*, 2, 2012.
- 472 [30] Lacroix J.M. *Mechanisms of Biofeedback Control*. Springer, Boston, MA, USA, 1986.
- 473 [31] Grice G. R. The relation of secondary reinforcement to delayed reward in visual discrimination learning. *Journal*  
474 *of experimental psychology*, 1948.
- 475 [32] S Kitazawa, T Kohno, and T Uka. Effects of delayed visual information on the rate and amount of prism  
476 adaptation in the human. *The Journal of Neuroscience*, 15(11):7644–7652, November 1995.
- 477 [33] Evans N., Gale S., Schurger A., and Blanke O. Visual feedback dominates the sense of agency for brain-machine  
478 actions. *PLoS ONE*, 2015.
- 479 [34] Oblak E.F., Lewis-Peacock J.A., and Sulzer J.S. Self-regulation strategy, feedback timing and hemodynamic  
480 properties modulate learning in a simulated fMRI neurofeedback environment. *PLoS Comput Biol*, 2017.
- 481 [35] Oppenheim A.V. and Schaffer R.W. *Discrete-Time Signal Processing. 3rd Edition*. Prentice Hall, 2010.
- 482 [36] Chen L.L., Madhavan R., Rapoport B.I., and Anderson W.S. Real-time brain oscillation detection and phase-  
483 locked stimulation using autoregressive spectral estimation and time-series forward prediction. *IEEE Trans*  
484 *Biomed Eng*, 60:753–762, 2013.
- 485 [37] Andreas Bruns. Fourier-, Hilbert- and wavelet-based signal analysis: are they really different approaches? *Jour-*  
486 *nal of Neuroscience Methods*, 137(2):321–332, August 2004.
- 487 [38] Bradley Voytek, Andrew S Kayser, David Badre, David Fegen, Edward F Chang, Nathan E Crone, Josef Parvizi,  
488 Robert T Knight, and Mark D’Esposito. Oscillatory dynamics coordinating human frontal networks in support  
489 of goal maintenance. *Nature Neuroscience*, 18(9):1318–1324, July 2015.
- 490 [39] Wei Rong Lee, Lou Caccetta, Kok Lay Teo, and Volker Rehbock. Optimal design of complex FIR filters with  
491 arbitrary magnitude and group delay responses. *IEEE Transactions on Signal Processing*, 2006.
- 492 [40] Simon Haykin. *Adaptive Filter Theory*. Prentice Hall, 2002.



- 493 [41] Alexei Ossadtchi, Platon Pronko, Sylvain Baillet, Mark E. Pflieger, and Tatiana Stroganova. Mutual informa-  
494 tion spectrum for selection of event-related spatial components. application to eloquent motor cortex mapping.  
495 *Frontiers in Neuroinformatics*, 7, 2014.
- 496 [42] Leslie H. Sherlin, Martijn Arns, Joel Lubar, Hartmut Heinrich, Cynthia Kerson, Ute Strehl, and M. Barry Ster-  
497 man. Neurofeedback and basic learning theory: Implications for research and practice. *Journal of Neurotherapy*,  
498 15(4):292–304, October 2011.
- 499 [43] Hyeyoung Shin, Robert Law, Shawn Tsutsui, Christopher I Moore, and Stephanie R Jones. The rate of transient  
500 beta frequency events predicts behavior across tasks and species. *Elife*, 6:e29086, 2017.
- 501 [44] Maxwell A. Sherman, Shane Lee, Robert Law, Saskia Haegens, Catherine A. Thorn, Matti S. Hämäläinen,  
502 Christopher I. Moore, and Stephanie R. Jones. Neural mechanisms of transient neocortical beta rhythms: Con-  
503 verging evidence from humans, computational modeling, monkeys, and mice. *Proceedings of the National*  
504 *Academy of Sciences*, 113(33):E4885–E4894, 2016.
- 505 [45] Christoph Zrenner, Debora Desideri, Paolo Belardinelli, and Ulf Ziemann. Real-time EEG-defined excitability  
506 states determine efficacy of TMS-induced plasticity in human motor cortex. *Brain Stimulation*, 11(2):374–389,  
507 March 2018.
- 508 [46] Natalie Schaworonkow, Pedro Caldana Gordon, Paolo Belardinelli, Ulf Ziemann, Til Ole Bergmann, and  
509 Christoph Zrenner.  $\mu$ -rhythm extracted with personalized eeg filters correlates with corticospinal excitability  
510 in real-time phase-triggered eeg-tms. *Frontiers in Neuroscience*, 12:954, 2018.
- 511 [47] Jianguang Ni, Thomas Wunderle, Christopher Murphy Lewis, Robert Desimone, Ilka Diester, and Pascal Fries.  
512 Gamma-rhythmic gain modulation. *Neuron*, 92(1):240–251, October 2016.
- 513 [48] Yang-Yu Liu and Albert-László Barabási. Control principles of complex systems. *Rev. Mod. Phys.*, 88, Sep  
514 2016.
- 515 [49] Schirrmester R.T., Springenberg J.T., Fiederer L., Glasstetter M., Eggenesperger K., Tangermann M., Hutter F.,  
516 Burgard W., and Ball T. SelDeep learning with convolutional neural networks for EEG decoding and visualiza-  
517 tion. *Hum Brain Mapp*, 2017.
- 518 [50] Halme HL Parkkonen L. Zubarev I, Zetter R. Adaptive neural network classifier for decoding meg signals.  
519 *Neuroimage*, 11(197):425–434, August 2019.
